# Supplementary material for: DeepRTAlign: toward accurate retention time alignment for large cohort LC-MS data analysis
Source: Research Square preprint supplement (doi:10.21203/rs.3.rs-1265889/v1), 2023-02-24
Supplement: Supplementary file 1 [file 797e30605b4df4d407796ac4.xlsx]

## Sheet: MS features
MS1_feature	t	p-value
1345.67_1345.7_19	5.2019	3.68807e-06
1299.65_1299.68_43	5.17282	4.08153e-06
945.48_945.51_7	4.60402	2.87194e-05
1350.71_1350.74_26	4.49111	4.19486e-05
1328.58_1328.61_1	4.42447	5.23793e-05
1028.47_1028.5_13	4.3029	7.83007e-05
983.49_983.52_24	4.25123	9.27759e-05
1671.83_1671.86_17	4.23787	9.69225e-05
1367.67_1367.7_12	4.18858	0.00011384
881.5_881.53_2	4.16134	0.000124383
1129.58_1129.61_2	4.15117	0.00012856
1157.57_1157.6_5	4.1453	0.000131032
1620.8_1620.83_58	4.11498	0.000144548
899.47_899.5_2	4.11209	0.000145902
1998.81_1998.84_2	4.09836	0.000152521
960.46_960.49_9	4.04942	0.000178555
964.5_964.53_3	4.01417	0.000199923
1583.93_1583.96_0	3.98547	0.000219123
1263.62_1263.65_14	3.96052	0.000237258
1048.5_1048.53_24	3.95654	0.000240283
991.51_991.54_20	3.92168	0.00026841
1397.63_1397.66_0	3.90178	0.000285857
1414.68_1414.71_2	3.89615	0.00029099
969.49_969.52_32	3.84182	0.000345321
904.45_904.48_16	3.83383	0.000354089
953.53_953.56_16	3.82392	0.000365265
914.44_914.47_4	3.81798	0.000372129
956.5_956.53_30	3.8115	0.000379754
2211.08_2211.11_6	3.78406	0.00041375
766.35_766.38_5	3.77346	0.000427652
1952.0_1952.03_2	3.74588	0.000465952
847.44_847.47_12	3.7426	0.000470727
2668.2_2668.23_1	3.74199	0.000471626
1354.7_1354.73_16	3.74145	0.00047241
1780.74_1780.77_9	3.73371	0.000483896
1309.56_1309.59_5	3.72591	0.000495725
1681.76_1681.79_17	3.71966	0.000505413
1616.67_1616.7_3	3.71147	0.000518389
1480.67_1480.7_12	3.71068	0.000519662
1615.76_1615.79_5	3.70842	0.000523292
881.49_881.52_4	3.70703	0.000525558
1164.54_1164.57_25	3.70476	0.000529246
1248.65_1248.68_17	3.69277	0.000549206
1088.58_1088.61_1	3.69062	0.000552857
1354.68_1354.71_46	3.68605	0.000560702
1005.45_1005.48_13	3.68547	0.000561705
1129.59_1129.62_2	3.66213	0.000603536
1080.55_1080.58_45	3.64943	0.000627536
1122.54_1122.57_37	3.6443	0.000637492
1322.64_1322.67_2	3.63744	0.00065104
1620.81_1620.84_11	3.6297	0.000666661
2718.27_2718.3_0	3.62907	0.000667947
2419.11_2419.14_4	3.62301	0.000680436
1143.51_1143.54_4	3.61997	0.000686798
1697.81_1697.84_21	3.61156	0.000704669
1243.56_1243.59_17	3.61093	0.000706016
1477.68_1477.71_26	3.60914	0.000709882
1076.58_1076.61_14	3.5964	0.000738006
848.43_848.46_23	3.58352	0.000767516
1363.68_1363.71_4	3.5758	0.000785751
1632.8_1632.83_6	3.57465	0.00078849
1053.54_1053.57_21	3.57263	0.000793345
1643.76_1643.79_0	3.56138	0.000820894
1343.69_1343.72_47	3.56116	0.00082146
2234.24_2234.27_0	3.55491	0.000837154
1632.8_1632.83_30	3.55408	0.000839271
982.54_982.57_29	3.52442	0.000918008
1367.66_1367.69_14	3.51884	0.00093358
1632.81_1632.84_65	3.51157	0.000954272
1444.67_1444.7_45	3.50577	0.000971076
927.54_927.57_3	3.50087	0.000985515
1424.64_1424.67_12	3.5008	0.000985713
1663.85_1663.88_3	3.49975	0.000988836
1060.51_1060.54_4	3.49637	0.000998915
2980.39_2980.42_6	3.49033	0.00101723
1504.71_1504.74_19	3.48835	0.00102328
1063.48_1063.51_16	3.48749	0.00102594
1185.57_1185.6_22	3.48717	0.00102691
1345.68_1345.71_3	3.48475	0.00103439
1111.49_1111.52_1	3.47708	0.00105848
1296.68_1296.71_16	3.47706	0.00105853
1743.87_1743.9_11	3.4705	0.00107953
1031.49_1031.52_1	3.46815	0.00108718
1031.5_1031.53_29	3.46815	0.00108718
935.44_935.47_40	3.46536	0.00109628
760.41_760.44_9	3.46423	0.00110001
2694.33_2694.36_5	3.46233	0.00110628
894.39_894.42_6	3.46016	0.00111346
1304.7_1304.73_47	3.4596	0.00111534
1266.59_1266.62_17	3.45524	0.00112997
707.4_707.43_14	3.4547	0.00113179
1142.58_1142.61_5	3.45282	0.00113816
2050.95_2050.98_10	3.45154	0.00114252
1630.79_1630.82_12	3.45056	0.00114589
1678.74_1678.77_17	3.44941	0.0011498
1459.67_1459.7_19	3.44874	0.00115213
943.48_943.51_31	3.44614	0.00116108
1239.63_1239.66_22	3.4382	0.0011889
2167.98_2168.01_5	3.43695	0.00119337
1187.64_1187.67_1	3.43026	0.00121736

## Sheet: peptides
peptide	t	p-value
TIQVSDFVR	5.85051	3.73365e-07
STNVIVDSGGFDELGGLLKPTVASQNQNLPVAK	4.71061	2.00272e-05
ELVLDNSR	4.66074	2.37141e-05
GHLLDSFAR	4.45397	4.74817e-05
WCDDYFFIAHR	4.36721	6.33322e-05
LMIETDAPWCGVK	4.25184	9.25903e-05
KLVEGLSALVVDVK	4.10114	0.000151159
NLSEVPQCVWR	4.07966	0.000162001
LYDPGQQYASHVR	4.03135	0.000189215
LLFEVFDENR	3.94863	0.000246405
MVVMHPMPR	3.94766	0.000247166
YTELPYGR	3.92706	0.000263868
GAEWHSHLGSMK	3.89174	0.000295077
LSDDTLLDIMR	3.87151	0.000314519
VYFPEQIHDVVR	3.86022	0.00032591
QQLDLTEQQGR	3.8144	0.000376319
LISEIEYR	3.78237	0.000415934
FSGWYDADLSPAGHEEAKR	3.76987	0.000432464
EKQPVAGSEGAQYR	3.75156	0.000457809
GTDIMYTGTLDCWRK	3.74937	0.000460933
LEELLTK	3.74808	0.000462789
EAADAELGQLR	3.74675	0.000464707
HLSPDGQYVPR	3.74519	0.000466952
AAEDYGVIK	3.69633	0.00054321
ISQATAQIK	3.69602	0.000543731
HVLFPLK	3.69098	0.000552245
KLTEAMGGGWQQEQFEHYK	3.68663	0.000559701
TWNVGSSNR	3.68004	0.000571195
LSPDQCR	3.67779	0.000575159
EQFNEFR	3.67309	0.000583536
TMTSEDLLR	3.66793	0.000592882
YSCLVAGPHQR	3.66448	0.000599205
KDLVDYITTHYK	3.64636	0.000633487
QIQVLQAQLQR	3.64445	0.000637212
FYFEELGK	3.63282	0.000660324
IQSSGGPLQITMK	3.60903	0.000710119
LIGIDDVPDAR	3.58267	0.0007695
VLVVGAGGIGCELLK	3.58189	0.000771333
GLMAALCPHK	3.58048	0.000774642
SLDVGGPLR	3.57726	0.000782261
GGDGINSIGGGQK	3.5476	0.000855898
ERDVYEELLTQAEIQGNINK	3.54367	0.000866142
LDGLCIPLR	3.53473	0.000889865
QYFVQWCADR	3.52307	0.000921747
QSFALEQLK	3.51892	0.000933373
RFEETGQELAELLEEEK	3.5178	0.00093651
QMVEHGGFYR	3.51233	0.000952089
LVGAIVYYDGQHNDAR	3.5108	0.000956474
MLGTEGGEGFVVK	3.50364	0.000977332
LEAGDHPVELLAR	3.50247	0.000980762
MREEVITLIR	3.49973	0.000988873
LQIFSVEGQK	3.49707	0.000996841
YLNPLYSSESHR	3.49629	0.000999171
EAQELSQNSAIK	3.49612	0.000999677
QEGMEAFLK	3.49504	0.00100294
LVLSGHTHSACEVHHGGR	3.4942	0.00100547
VFNTGGAPR	3.49264	0.0010102
KGGSWIQEINVAEK	3.49217	0.0010116
KFNILGTHTK	3.4893	0.00102036
IASLLLAK	3.48904	0.00102115
FSPFPVQDRPESSLVFK	3.4887	0.00102221
FVSEMLQK	3.48762	0.00102554
YGGDEIPFSPYR	3.48282	0.0010404
EEGPYEVEVTYDGVPVPGSPFPLEAVAPTKPSK	3.46506	0.00109727
VIGHYAGEDATDAFR	3.46136	0.00110948
IDCDNLEQYFIQQGGGPDKK	3.4448	0.00116573
VISYEEGK	3.42143	0.0012498
VCVEHHTFYR	3.41995	0.00125528
WEVLIGSSHILTPTR	3.41863	0.00126024
ISQEIGNLMK	3.40532	0.00131105
IVGLSTALANAR	3.40481	0.00131302
SFEDIHQYR	3.3972	0.00134297
YWTLTATGGVQSTASSK	3.38799	0.00138013
MSDGLFLQK	3.38111	0.00140849
AFPCWDEPAIK	3.37578	0.00143083
FVYTPAMESVCGYFHR	3.36567	0.00147416
IHVSYQETQQMQMK	3.36471	0.00147837
ASAGSYISALR	3.36165	0.00149175
ENNLSEEVLGK	3.3592	0.00150259
EMTLDEWK	3.35234	0.00153322
SSNFLYLQVK	3.34945	0.00154631
LLDSSTVTHLFK	3.33913	0.00159397
LHLDYIGPCK	3.33545	0.00161126
LSGGIDFNQPLVITR	3.32196	0.00167628
VLPFFERPDFQLFTGNK	3.31898	0.00169099
TLLLQGHHDK	3.31793	0.00169619
PGAAMVEMADGYAVDR	3.30546	0.00175923
ELELVYAR	3.29951	0.00179004
KYDGYTSCPLVTGYNR	3.28788	0.00185181
SGLSDIILGK	3.28061	0.00189146
HQIHYHYGR	3.27399	0.0019282
SADCYNEIYNFK	3.27226	0.00193795
DEESGSGSNPFQHLEK	3.25979	0.00200942
VTELVDAVYDPYKPYQLK	3.2514	0.00205889
ALSTFFVENSLR	3.25005	0.00206696
VYSQITVQK	3.2492	0.00207206
LGELQGNHFTVVLR	3.24869	0.00207512
HFIATVSHDCK	3.24827	0.00207768
ENDWYLAYK	3.24814	0.00207844
GASTDICAFCHK	3.24734	0.00208325

## Sheet: proteins
protein	t	p-value
O95864	3.33339	0.00162105
P52209	3.25337	0.0020472
P30085	3.20059	0.00238404
P06756	3.12398	0.00296699
P53701	3.04182	0.00373954
Q8WWI5	3.00316	0.00416499
Q16719	2.97741	0.00447299
O95379	2.97273	0.00453121
P24557	2.91494	0.00531076
P00491	2.91447	0.00531758
Q9UP95	2.88486	0.00576425
P20933	2.87141	0.00597838
Q8WW01	2.8242	0.00679007
P37837	2.82126	0.00684389
Q15118	2.80808	0.00708972
Q0P6H9	2.78997	0.00744118
P30453	2.73942	0.00850859
Q13492	2.73122	0.0086945
Q15113	2.7286	0.00875458
Q9BX59	2.71633	0.00904143
Q9BZX2	2.70327	0.00935643
Q15642	2.68773	0.00974433
P01033	2.683	0.00986525
Q96FQ6	2.66875	0.010238
Q9Y3S2	2.66809	0.0102556
Q9Y680	2.64834	0.0107944
Q9NRQ2	2.64763	0.0108144
P23610	2.63753	0.0111004
Q13094	2.63231	0.0112506
P42331	2.63178	0.0112662
Q9H000	2.62938	0.0113361
P48637	2.60536	0.0120576
Q9BUP3	2.60094	0.0121952
Q56VL3	2.58865	0.0125842
P01906	2.58703	0.0126363
Q96DX5	2.58357	0.0127487
Q92764	2.56474	0.0133744
Q9UBP6	2.55683	0.0136453
Q15555	2.55675	0.0136482
Q9Y3X0	2.55313	0.0137739
P09486	2.55228	0.0138037
Q13976	2.55163	0.0138263
Q9UDX5	2.54593	0.0140272
O60343	2.54263	0.0141445
Q92610	2.54163	0.0141803
Q9HB40	2.5384	0.0142967
P16070	2.53547	0.0144026
Q7L5N7	2.53138	0.014552
Q9NUB1	2.50261	0.0156425
O00139	2.49883	0.015791
Q8IYB5	2.49187	0.0160681
P00813	2.49113	0.0160979
P50281	2.47893	0.016595
O95298	2.47757	0.0166512
Q9UJ14	2.47024	0.0169575
O95104	2.45988	0.0173992
P62995	2.45743	0.0175048
Q13287	2.43982	0.0182838
Q9BXB4	2.43421	0.0185379
P36551	2.42931	0.0187632
Q96IV0	2.42704	0.0188679
P59666	2.41777	0.0193025
P0C0L4	2.41686	0.0193456
Q7Z4H8	2.41581	0.0193954
Q9UEW8	2.41039	0.0196549
Q13247	2.40028	0.0201465
Q14005	2.39188	0.0205638
P12236	2.38919	0.0206993
O43175	2.37577	0.0213858
Q8NBN3	2.37552	0.0213984
P54105	2.36592	0.0219028
Q8TD22	2.36521	0.0219403
O75494	2.35448	0.022517
P05121	2.34862	0.0228375
O95428	2.34541	0.0230149
P02788	2.34014	0.0233087
Q8IUC4	2.33354	0.0236817
P09972	2.32968	0.0239021
Q96H79	2.3202	0.0244509
Q92520	2.31592	0.0247028
P04208	2.31156	0.0249617
Q8WUK0	2.30951	0.0250842
Q8IXT5	2.29688	0.0258501
Q9H4G4	2.29612	0.0258972
P20160	2.28964	0.0262992
P28062	2.28662	0.0264883
Q32P28	2.28504	0.0265875
A9UHW6	2.28486	0.0265988
Q0VGL1	2.27728	0.0270813
Q9UKK3	2.27479	0.0272409
Q6ZWL3	2.27409	0.0272861
P08571	2.27052	0.0275178
P32321	2.268	0.0276821
Q86YS3	2.26536	0.0278549
Q6IQ22	2.26129	0.0281234
P32456	2.2564	0.0284495
P33240	2.2471	0.0290784
P35900	2.24621	0.0291394
O94776	2.24329	0.0293392
Q9NR56	2.24115	0.0294871
