# Supplementary material for: DeepRTAlign: toward accurate retention time alignment for large cohort LC-MS data analysis
Source: Research Square preprint supplement (doi:10.21203/rs.3.rs-1265889/v1), 2023-02-24
Supplement: Supplementary file 2 [file 8f39a9deee14b97b1b85e707.xlsx]

## Sheet: HCC-N
sample	fraction	MZmine2 P	MZmine2 TP	MZmine2 FP	MZmine2 precision	MZmine2 recall	MZmine2+DeepRTAlign P	MZmine2+DeepRTAlign TP	MZmine2+DeepRTAlign FP	MZmine2+DeepRTAlign precision	MZmine2+DeepRTAlign recall	OpenMS P	OpenMS TP	OpenMS FP	OpenMS precision	OpenMS recall	OpenMS+DeepRTAlign P	OpenMS+DeepRTAlign TP	OpenMS+DeepRTAlign FP	OpenMS+DeepRTAlign precision	OpenMS+DeepRTAlign recall
X314-X355	1	1233	971	155	0.862345	0.78751	1233	1187	96	0.925175	0.962693	2208	1713	321	0.842183	0.775815	2208	2131	135	0.940424	0.965127
X314-X355	2	1182	956	94	0.910476	0.808799	1182	1152	82	0.933549	0.974619	2366	1866	269	0.874005	0.788673	2366	2291	152	0.937781	0.968301
X314-X355	3	1043	881	61	0.935244	0.844679	1043	1018	45	0.957667	0.976031	2394	1954	226	0.89633	0.816207	2394	2350	86	0.964696	0.981621
X314-X355	4	802	670	37	0.947666	0.835411	802	789	23	0.971675	0.983791	2086	1699	149	0.919372	0.814477	2086	2037	55	0.973709	0.97651
X314-X355	5	534	462	25	0.948665	0.865169	534	522	13	0.975701	0.977528	1677	1411	112	0.926461	0.841383	1677	1652	37	0.978094	0.985092
X314-X355	6	305	264	15	0.946237	0.865574	305	300	5	0.983607	0.983607	1097	939	57	0.942771	0.855971	1097	1076	41	0.963295	0.980857
X355-X279	1	1538	1249	163	0.884561	0.812094	1538	1487	87	0.944727	0.96684	2013	1635	247	0.868757	0.812221	2013	1927	103	0.949261	0.957278
X355-X279	2	1381	1175	109	0.915109	0.850833	1381	1343	64	0.954513	0.972484	2168	1806	244	0.880976	0.833026	2168	2102	94	0.957195	0.969557
X355-X279	3	1155	991	81	0.92444	0.858009	1155	1131	42	0.964194	0.979221	2194	1883	185	0.910542	0.85825	2194	2139	76	0.965688	0.974932
X355-X279	4	870	751	39	0.950633	0.863218	870	856	13	0.98504	0.983908	1878	1646	120	0.93205	0.876464	1878	1841	47	0.975106	0.980298
X355-X279	5	647	555	37	0.9375	0.857805	647	640	16	0.97561	0.989181	1561	1371	80	0.944866	0.878283	1561	1530	29	0.981398	0.980141
X355-X279	6	383	343	17	0.952778	0.895561	383	376	9	0.976623	0.981723	1170	1012	49	0.953817	0.864957	1170	1124	25	0.978242	0.960684
X279-X300	1	1529	1321	120	0.916724	0.863963	1529	1509	64	0.959313	0.98692	2177	1808	236	0.88454	0.830501	2177	2134	95	0.95738	0.980248
X279-X300	2	1497	1277	103	0.925362	0.853039	1497	1461	44	0.970764	0.975952	2270	1914	201	0.904965	0.843172	2270	2240	65	0.9718	0.986784
X279-X300	3	1137	1002	64	0.939962	0.881266	1137	1123	33	0.971453	0.987687	2116	1771	148	0.922876	0.836957	2116	2074	62	0.970974	0.980151
X279-X300	4	998	890	38	0.959052	0.891784	998	991	18	0.982161	0.992986	1904	1712	96	0.946903	0.89916	1904	1888	29	0.984872	0.991597
X279-X300	5	664	572	29	0.951747	0.861446	664	657	11	0.983533	0.989458	1531	1340	83	0.941673	0.875245	1531	1505	24	0.984303	0.983018
X279-X300	6	375	333	18	0.948718	0.888	375	373	12	0.968831	0.994667	1039	869	49	0.946623	0.836381	1039	1023	29	0.972433	0.984601
X300-XH15	1	860	557	146	0.792319	0.647674	860	693	117	0.855556	0.805814	1655	1166	273	0.810285	0.704532	1655	1484	152	0.90709	0.896677
X300-XH15	2	639	500	90	0.847458	0.782473	639	572	63	0.900787	0.895149	1280	899	241	0.788596	0.702344	1280	1221	151	0.889942	0.953906
X300-XH15	3	587	469	62	0.883239	0.798978	587	555	53	0.912829	0.945486	1430	1089	168	0.866348	0.761538	1430	1384	95	0.935767	0.967832
X300-XH15	4	532	404	43	0.903803	0.759398	532	512	26	0.951673	0.962406	1373	1024	113	0.900616	0.745812	1373	1329	64	0.954056	0.967953
X300-XH15	5	335	267	32	0.892977	0.797015	335	321	21	0.938596	0.958209	1081	894	64	0.933194	0.827012	1081	1041	54	0.950685	0.962997
X300-XH15	6	182	151	21	0.877907	0.82967	182	171	10	0.944751	0.93956	751	557	44	0.926789	0.741678	751	707	35	0.95283	0.941411

## Sheet: GC-N
sample	fraction	MZmine2 P	MZmine2 TP	MZmine2 FP	MZmine2 precision	MZmine2 recall	MZmine2+DeepRTAlign P	MZmine2+DeepRTAlign TP	MZmine2+DeepRTAlign FP	MZmine2+DeepRTAlign precision	MZmine2+DeepRTAlign recall	OpenMS P	OpenMS TP	OpenMS FP	OpenMS precision	OpenMS recall	OpenMS+DeepRTAlign P	OpenMS+DeepRTAlign TP	OpenMS+DeepRTAlign FP	OpenMS+DeepRTAlign precision	OpenMS+DeepRTAlign recall
GC035-GC047	1	91	81	8	0.910112	0.89011	91	79	8	0.908046	0.868132	437	96	27	0.780488	0.21968	437	373	33	0.918719	0.853547
GC035-GC047	2	1166	151	330	0.313929	0.129503	1166	861	168	0.836735	0.738422	1535	371	230	0.617304	0.241694	1535	1247	184	0.871419	0.812378
GC035-GC047	3	333	188	76	0.712121	0.564565	333	255	33	0.885417	0.765766	644	229	36	0.864151	0.35559	644	485	41	0.922053	0.753106
GC035-GC047	4	1124	16	235	0.063745	0.0142349	1124	889	134	0.869013	0.790925	1681	13	127	0.0928571	0.00773349	1681	1311	172	0.884019	0.779893
GC035-GC047	5	922	419	163	0.719931	0.454447	922	626	79	0.887943	0.678959	1373	521	139	0.789394	0.379461	1373	908	108	0.893701	0.661326
GC035-GC047	6	134	10	32	0.238095	0.0746269	134	94	19	0.831858	0.701493	287	0	5	0	0	287	182	16	0.919192	0.634146
GC047-GC054	1	131	108	8	0.931034	0.824427	131	40	6	0.869565	0.305344	561	444	30	0.936709	0.791444	561	372	24	0.939394	0.663102
GC047-GC054	2	1433	812	213	0.792195	0.566643	1433	1319	139	0.904664	0.920447	1788	1055	195	0.844	0.590045	1788	1659	102	0.942078	0.927852
GC047-GC054	3	384	224	63	0.780488	0.583333	384	277	23	0.923333	0.721354	631	395	34	0.920746	0.62599	631	433	31	0.93319	0.686212
GC047-GC054	4	1483	1028	190	0.844007	0.693189	1483	1320	83	0.940841	0.890088	2040	1285	223	0.852122	0.629902	2040	1735	109	0.940889	0.85049
GC047-GC054	5	1028	262	148	0.639024	0.254864	1028	574	64	0.899687	0.558366	1435	547	101	0.844136	0.381185	1435	811	85	0.905134	0.565157
GC047-GC054	6	249	24	39	0.380952	0.0963855	249	137	7	0.951389	0.550201	668	9	20	0.310345	0.0134731	668	278	17	0.942373	0.416168
GC054-GC063	1	1335	994	198	0.833893	0.744569	1335	1217	142	0.895511	0.91161	1622	926	230	0.801038	0.5709	1622	1460	165	0.898462	0.900123
GC054-GC063	2	1520	1163	254	0.820748	0.765132	1520	1426	184	0.885714	0.938158	2075	1217	321	0.791287	0.586506	2075	1853	208	0.899078	0.893012
GC054-GC063	3	1448	1054	247	0.810146	0.727901	1448	991	176	0.849186	0.684392	1627	1094	220	0.832572	0.672403	1627	1091	169	0.865873	0.670559
GC054-GC063	4	1665	1226	216	0.850208	0.736336	1665	1489	131	0.919136	0.894294	2144	1482	288	0.837288	0.691231	2144	1915	177	0.915392	0.89319
GC054-GC063	5	1189	747	139	0.843115	0.628259	1189	551	96	0.851623	0.463415	2038	1242	219	0.850103	0.609421	2038	762	179	0.809777	0.373896
GC054-GC063	6	694	555	66	0.89372	0.799712	694	588	32	0.948387	0.847262	1994	1193	146	0.890963	0.598295	1994	1528	88	0.945545	0.766299
GC063-GC075	1	1066	606	234	0.721429	0.56848	1066	943	146	0.865932	0.884615	1269	667	193	0.775581	0.525611	1269	1056	155	0.872007	0.832151
GC063-GC075	2	1145	577	285	0.669374	0.50393	1145	1033	184	0.848809	0.902183	1330	690	226	0.753275	0.518797	1330	1185	187	0.863703	0.890977
GC063-GC075	3	807	168	270	0.383562	0.208178	807	499	135	0.787066	0.61834	944	161	123	0.566901	0.170551	944	593	120	0.831697	0.628178
GC063-GC075	4	890	428	260	0.622093	0.480899	890	726	116	0.862233	0.81573	1127	497	179	0.735207	0.440994	1127	895	126	0.876592	0.794144
GC063-GC075	5	548	275	147	0.651659	0.501825	548	323	63	0.836788	0.589416	1070	507	145	0.777607	0.473832	1070	578	113	0.836469	0.540187
GC063-GC075	6	287	225	45	0.833333	0.783972	287	204	18	0.918919	0.710801	794	484	67	0.878403	0.609572	794	516	57	0.900524	0.649874

## Sheet: UPS2-Y
sample	fraction	MZmine2 P	MZmine2 TP	MZmine2 FP	MZmine2 precision	MZmine2 recall	MZmine2+DeepRTAlign P	MZmine2+DeepRTAlign TP	MZmine2+DeepRTAlign FP	MZmine2+DeepRTAlign precision	MZmine2+DeepRTAlign recall	OpenMS P	OpenMS TP	OpenMS FP	OpenMS precision	OpenMS recall	OpenMS+DeepRTAlign P	OpenMS+DeepRTAlign TP	OpenMS+DeepRTAlign FP	OpenMS+DeepRTAlign precision	OpenMS+DeepRTAlign recall
A1_A2	1	35	27	1	0.964286	0.771429	35	30	1	0.967742	0.857143	388	196	1	0.994924	0.505155	388	259	5	0.981061	0.667526
A2_A3	1	30	21	0	1	0.7	30	27	1	0.964286	0.9	374	183	1	0.994565	0.489305	374	260	4	0.984848	0.695187
B1_B2	1	8	5	1	0.833333	0.625	8	7	0	1	0.875	285	123	3	0.97619	0.431579	285	192	0	1	0.673684
B2_B3	1	8	5	0	1	0.625	8	8	1	0.888889	1	281	136	6	0.957746	0.483986	281	195	0	1	0.69395
C1_C2	1	6	5	1	0.833333	0.833333	6	5	0	1	0.833333	153	88	2	0.977778	0.575163	153	121	0	1	0.79085
C2_C3	1	6	6	0	1	1	6	5	0	1	0.833333	147	84	6	0.933333	0.571429	147	112	0	1	0.761905
D1_D2	1	1	1	0	1	1	1	1	0	1	1	59	37	1	0.973684	0.627119	59	53	0	1	0.898305
D2_D3	1	1	1	0	1	1	1	1	0	1	1	51	29	1	0.966667	0.568627	51	45	0	1	0.882353

## Sheet: UPS2-M
sample	fraction	MZmine2 P	MZmine2 TP	MZmine2 FP	MZmine2 precision	MZmine2 recall	MZmine2+DeepRTAlign P	MZmine2+DeepRTAlign TP	MZmine2+DeepRTAlign FP	MZmine2+DeepRTAlign precision	MZmine2+DeepRTAlign recall	OpenMS P	OpenMS TP	OpenMS FP	OpenMS precision	OpenMS recall	OpenMS+DeepRTAlign P	OpenMS+DeepRTAlign TP	OpenMS+DeepRTAlign FP	OpenMS+DeepRTAlign precision	OpenMS+DeepRTAlign recall
A1_A2	1	45	38	1	0.974359	0.844444	45	40	1	0.97561	0.888889	480	259	6	0.977358	0.539583	480	291	3	0.989796	0.60625
A2_A3	1	43	34	5	0.871795	0.790698	43	42	1	0.976744	0.976744	461	265	2	0.992509	0.574837	461	291	1	0.996575	0.631236
B1_B2	1	11	9	2	0.818182	0.818182	11	10	0	1	0.909091	353	212	12	0.946429	0.600567	353	241	2	0.99177	0.68272
B2_B3	1	16	16	0	1	1	16	15	0	1	0.9375	355	226	6	0.974138	0.63662	355	252	2	0.992126	0.709859
C1_C2	1	9	8	1	0.888889	0.888889	9	9	0	1	1	219	158	8	0.951807	0.721461	219	176	3	0.98324	0.803653
C2_C3	1	10	8	1	0.888889	0.8	10	10	0	1	1	217	153	7	0.95625	0.705069	217	172	1	0.99422	0.792627
D1_D2	1	5	5	0	1	1	5	5	0	1	1	132	101	8	0.926606	0.765152	132	114	3	0.974359	0.863636
D2_D3	1	6	4	1	0.8	0.666667	6	5	0	1	0.833333	134	99	6	0.942857	0.738806	134	114	1	0.991304	0.850746

## Sheet: AT
sample	fraction	MZmine2 P	MZmine2 TP	MZmine2 FP	MZmine2 precision	MZmine2 recall	MZmine2+DeepRTAlign P	MZmine2+DeepRTAlign TP	MZmine2+DeepRTAlign FP	MZmine2+DeepRTAlign precision	MZmine2+DeepRTAlign recall	OpenMS P	OpenMS TP	OpenMS FP	OpenMS precision	OpenMS recall	OpenMS+DeepRTAlign P	OpenMS+DeepRTAlign TP	OpenMS+DeepRTAlign FP	OpenMS+DeepRTAlign precision	OpenMS+DeepRTAlign recall
0_1-0_2	1	5	5	0	1	1	5	5	0	1	1	369	360	3	0.991736	0.97561	369	361	2	0.99449	0.97832
0_2-0_3	1	5	3	0	1	0.6	5	5	0	1	1	384	369	4	0.989276	0.960938	384	367	2	0.99458	0.955729
24_1-24_2	1	4	3	0	1	0.75	4	4	0	1	1	673	626	14	0.978125	0.930163	673	633	8	0.98752	0.940565
24_2-24_3	1	7	6	0	1	0.857143	7	7	0	1	1	667	625	21	0.967492	0.937031	667	627	16	0.975117	0.94003
36_1-36_2	1	4	3	0	1	0.75	4	4	0	1	1	871	775	49	0.940534	0.889782	871	785	36	0.956151	0.901263
36_2-36_3	1	5	5	0	1	1	5	5	0	1	1	885	789	30	0.96337	0.891525	885	818	16	0.980815	0.924294
48_1-48_2	1	14	11	0	1	0.785714	14	14	0	1	1	1126	1038	53	0.951421	0.921847	1126	1033	45	0.958256	0.917407
48_2-48_3	1	7	7	0	1	1	7	7	0	1	1	944	838	54	0.939462	0.887712	944	883	37	0.959783	0.935381
60_1-60_2	1	3	3	0	1	1	3	3	0	1	1	1041	956	36	0.96371	0.918348	1041	976	19	0.980905	0.93756
60_2-60_3	1	3	3	0	1	1	3	3	0	1	1	937	839	39	0.955581	0.895411	937	844	16	0.981395	0.900747
72_1-72_2	1	6	6	0	1	1	6	6	0	1	1	1108	1045	39	0.964022	0.943141	1108	1039	18	0.982971	0.937726
72_2-72_3	1	7	6	0	1	0.857143	7	7	0	1	1	1090	1028	42	0.960748	0.943119	1090	1023	19	0.981766	0.938532

## Sheet: EC-H
sample	fraction	MZmine2 P	MZmine2 TP	MZmine2 FP	MZmine2 precision	MZmine2 recall	MZmine2+DeepRTAlign P	MZmine2+DeepRTAlign TP	MZmine2+DeepRTAlign FP	MZmine2+DeepRTAlign precision	MZmine2+DeepRTAlign recall	OpenMS P	OpenMS TP	OpenMS FP	OpenMS precision	OpenMS recall	OpenMS+DeepRTAlign P	OpenMS+DeepRTAlign TP	OpenMS+DeepRTAlign FP	OpenMS+DeepRTAlign precision	OpenMS+DeepRTAlign recall
A1_A2	1	18	13	1	0.928571	0.722222	18	17	3	0.85	0.944444	363	294	19	0.939297	0.809917	363	305	13	0.959119	0.84022
A2_A3	1	14	13	2	0.866667	0.928571	14	12	3	0.8	0.857143	300	237	25	0.90458	0.79	300	264	15	0.946237	0.88
A3_A4	1	26	24	1	0.96	0.923077	26	22	0	1	0.846154	280	241	18	0.930502	0.860714	280	249	14	0.946768	0.889286
B1_B2	1	38	34	1	0.971429	0.894737	38	34	4	0.894737	0.894737	526	438	33	0.929936	0.8327	526	459	23	0.952282	0.872624
B2_B3	1	12	9	0	1	0.75	12	11	1	0.916667	0.916667	443	344	33	0.912467	0.776524	443	345	26	0.929919	0.778781
B3_B4	1	23	21	3	0.875	0.913043	23	20	3	0.869565	0.869565	405	327	24	0.931624	0.807407	405	353	21	0.94385	0.871605
C1_C2	1	37	33	2	0.942857	0.891892	37	34	0	1	0.918919	657	577	45	0.927653	0.878234	657	557	28	0.952137	0.847793
C2_C3	1	43	39	2	0.95122	0.906977	43	40	2	0.952381	0.930233	632	530	43	0.924956	0.838608	632	552	24	0.958333	0.873418
C3_C4	1	34	31	1	0.96875	0.911765	34	28	7	0.8	0.823529	518	427	45	0.904661	0.824324	518	441	37	0.922594	0.851351
D1_D2	1	54	49	4	0.924528	0.907407	54	45	5	0.9	0.833333	785	615	55	0.91791	0.783439	785	663	36	0.948498	0.844586
D2_D3	1	30	25	4	0.862069	0.833333	30	27	3	0.9	0.9	680	533	72	0.880992	0.783824	680	551	49	0.918333	0.810294
D3_D4	1	35	33	0	1	0.942857	35	29	1	0.966667	0.828571	635	505	45	0.918182	0.795276	635	521	28	0.948998	0.820472
E1_E2	1	71	63	2	0.969231	0.887324	71	64	4	0.941176	0.901408	954	780	58	0.930788	0.81761	954	783	40	0.951397	0.820755
E2_E3	1	42	29	1	0.966667	0.690476	42	37	2	0.948718	0.880952	784	612	66	0.902655	0.780612	784	638	44	0.935484	0.813776
E3_E4	1	43	37	1	0.973684	0.860465	43	35	1	0.972222	0.813953	735	590	42	0.933544	0.802721	735	601	25	0.960064	0.817687
